# Supplementary material for: Genetic and biological characteristics of avian influenza virus subtype H1N8 in environments related to live poultry markets in China
Source: Springer Nature journal article supplement (doi:10.1186/s12879-019-4079-z), 2019-05-22
Supplement: MOESM1 [file 16741996]

PB2

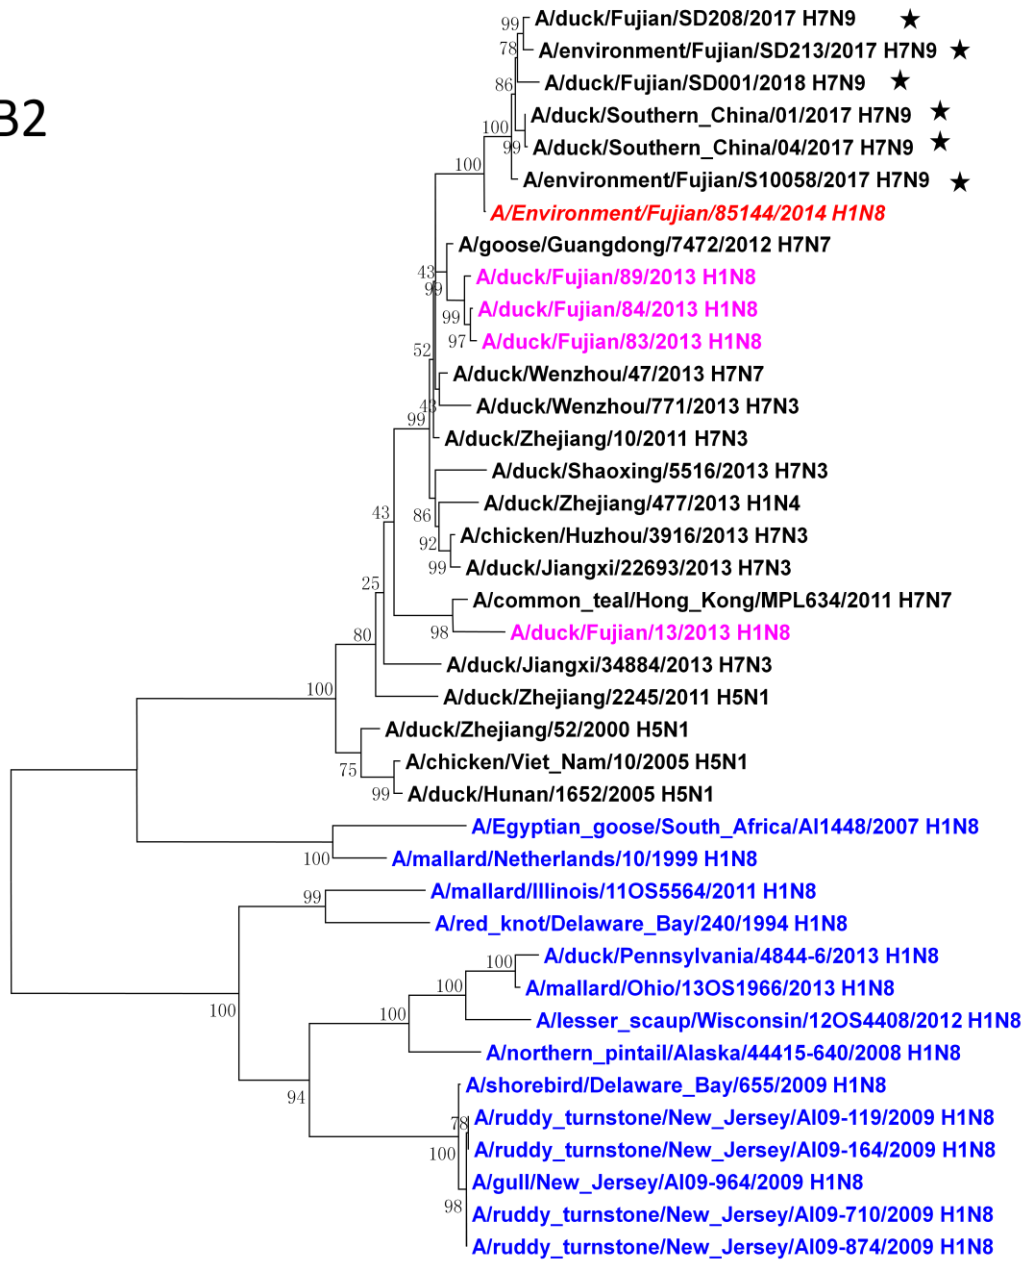

0.02

PB1

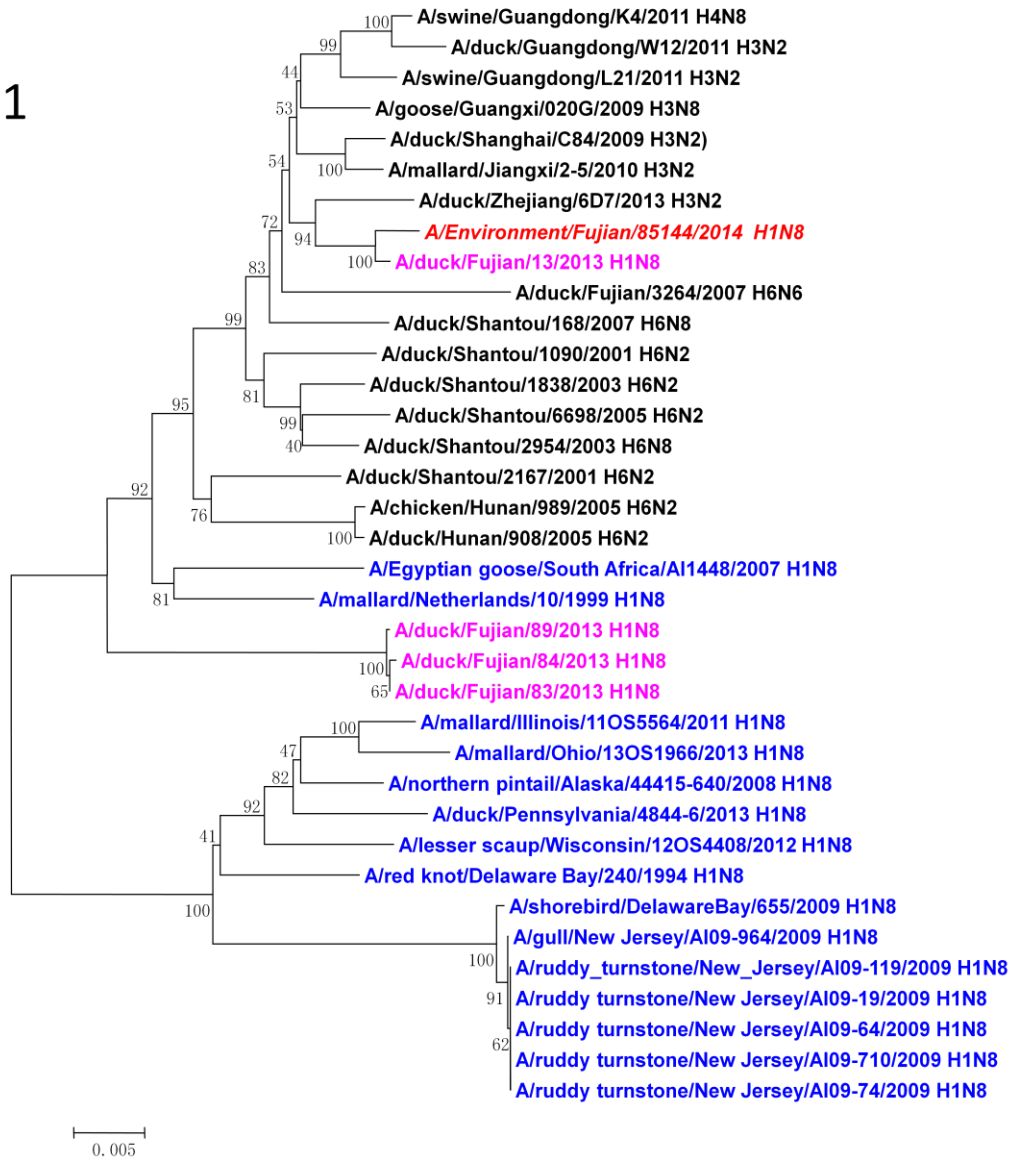

PA

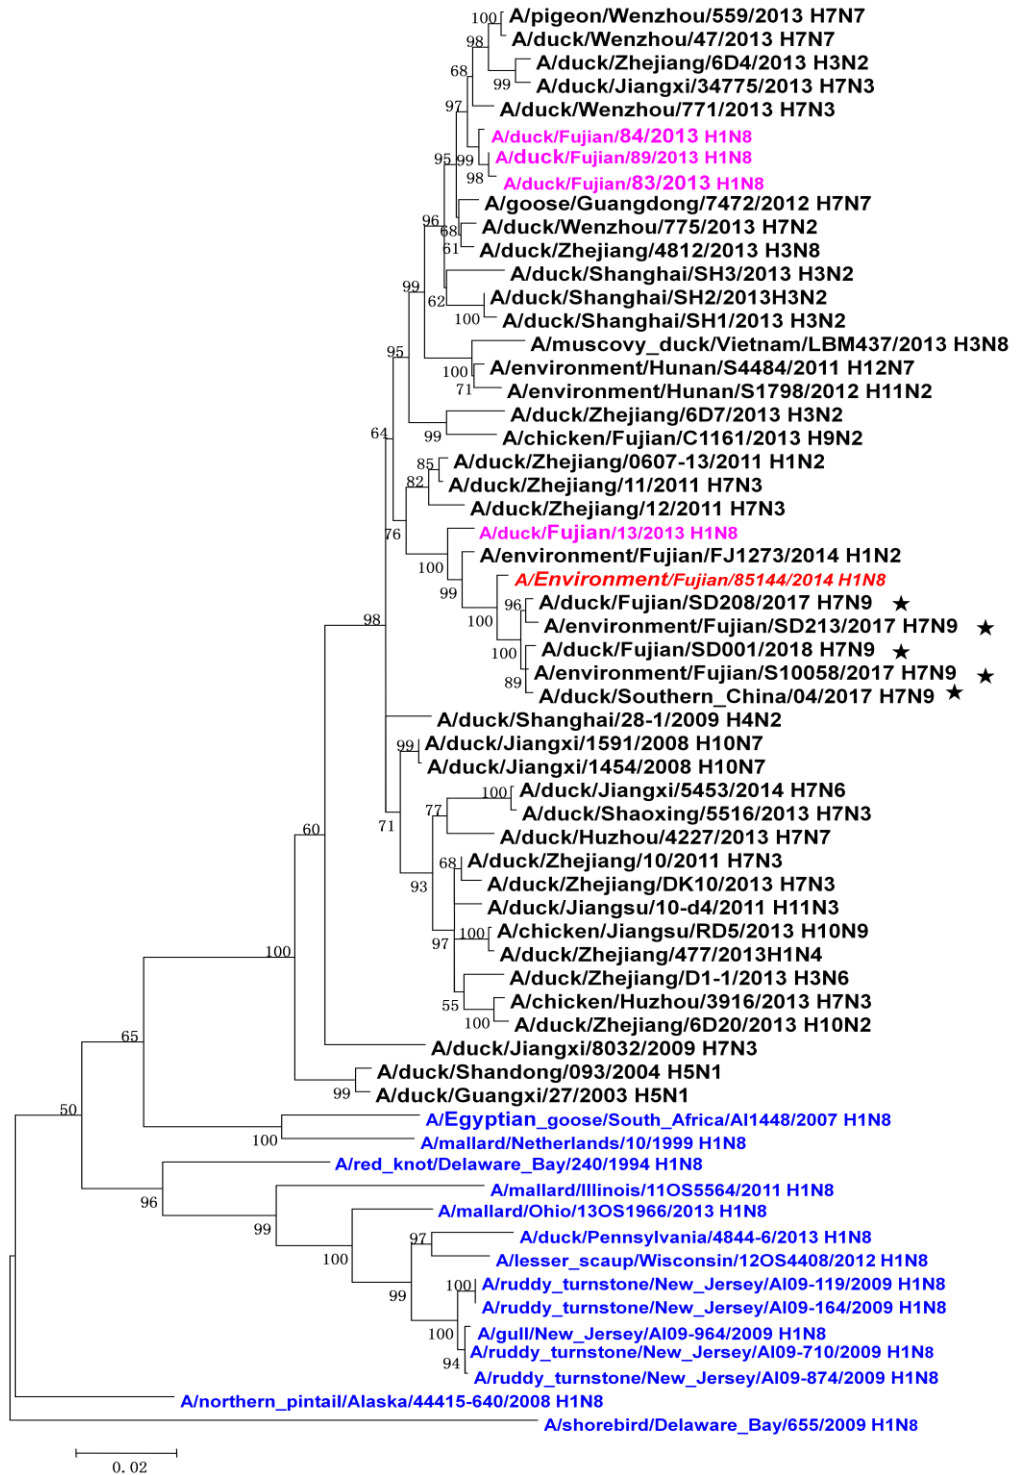

NP

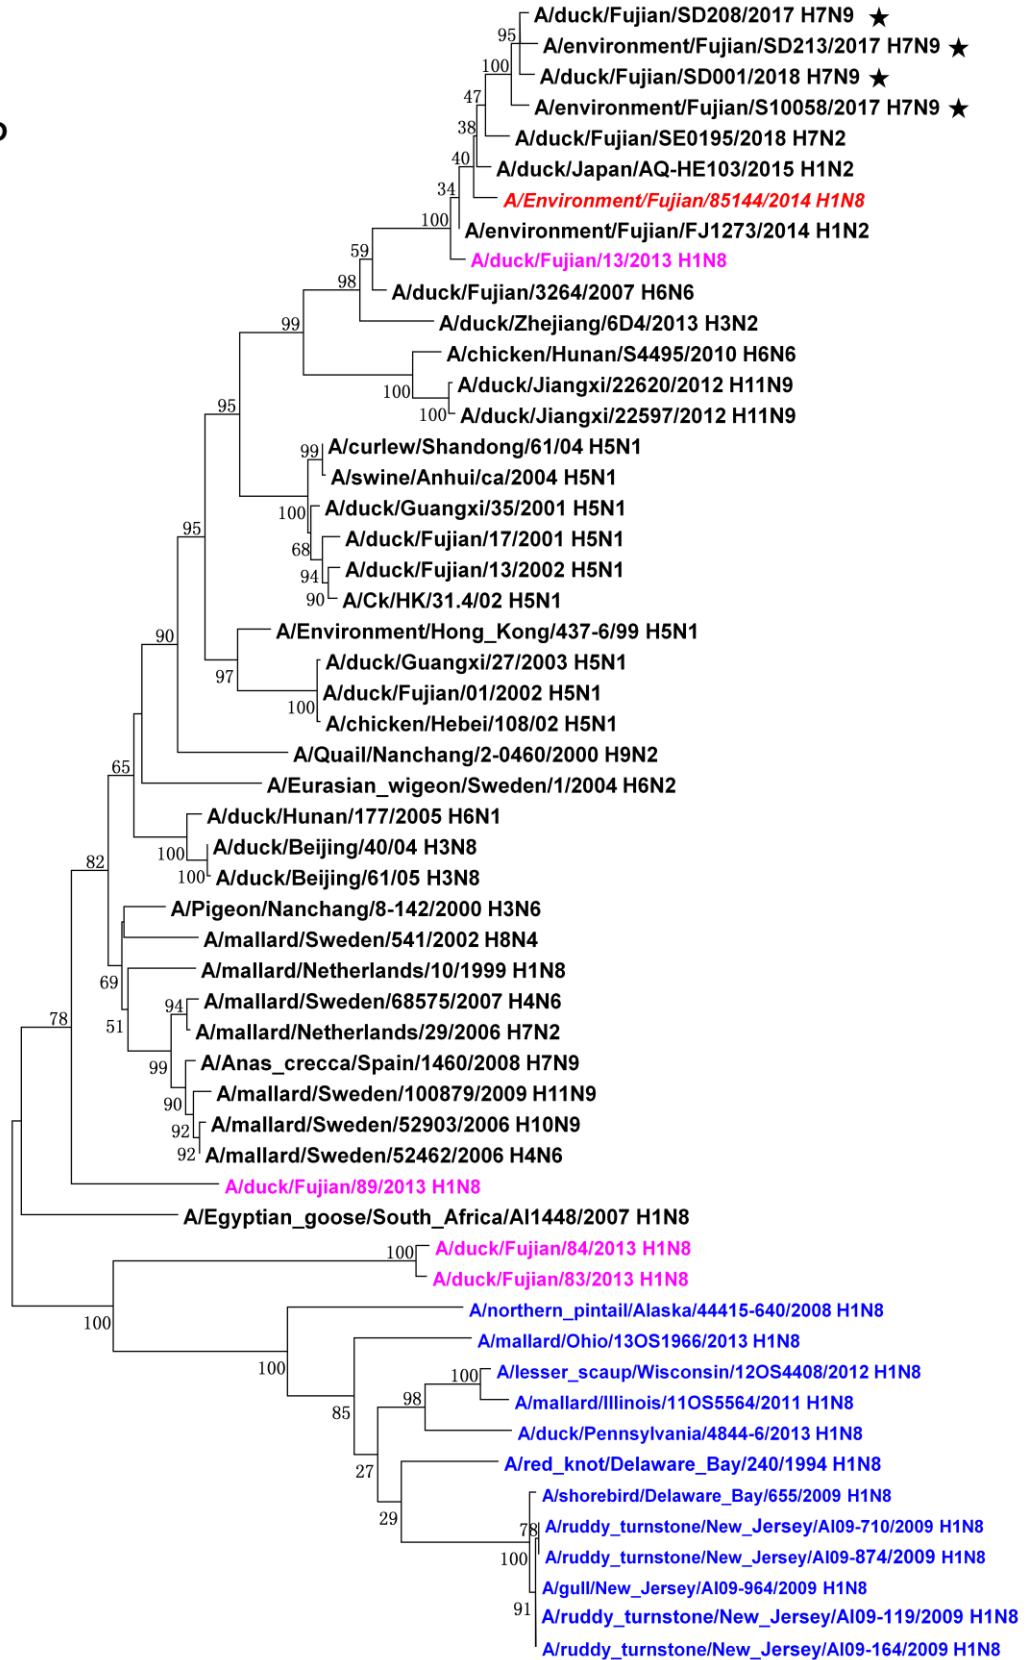

0.02

M

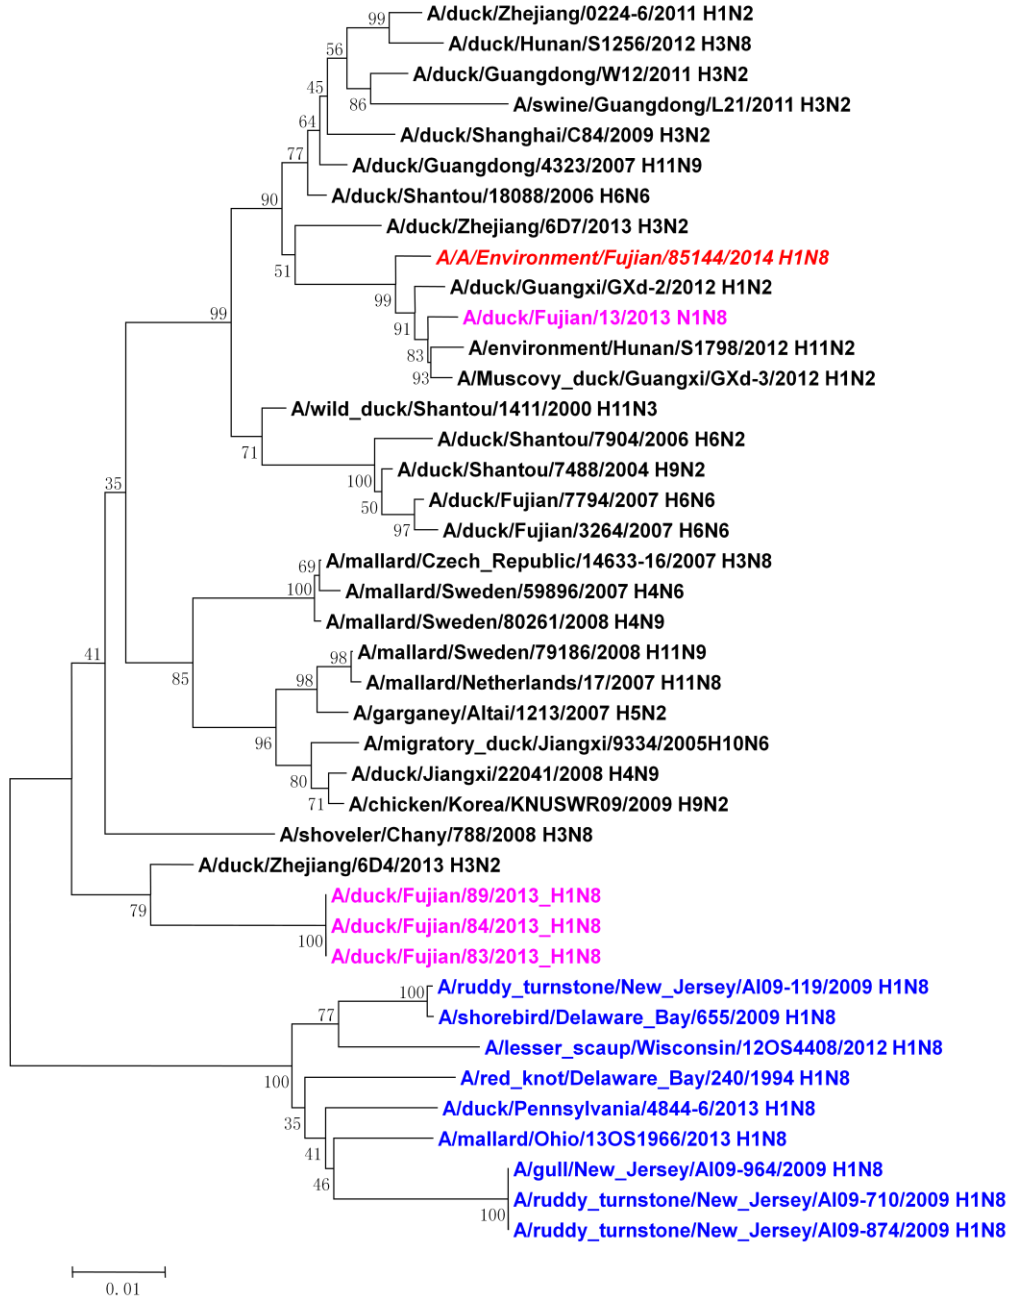

NS

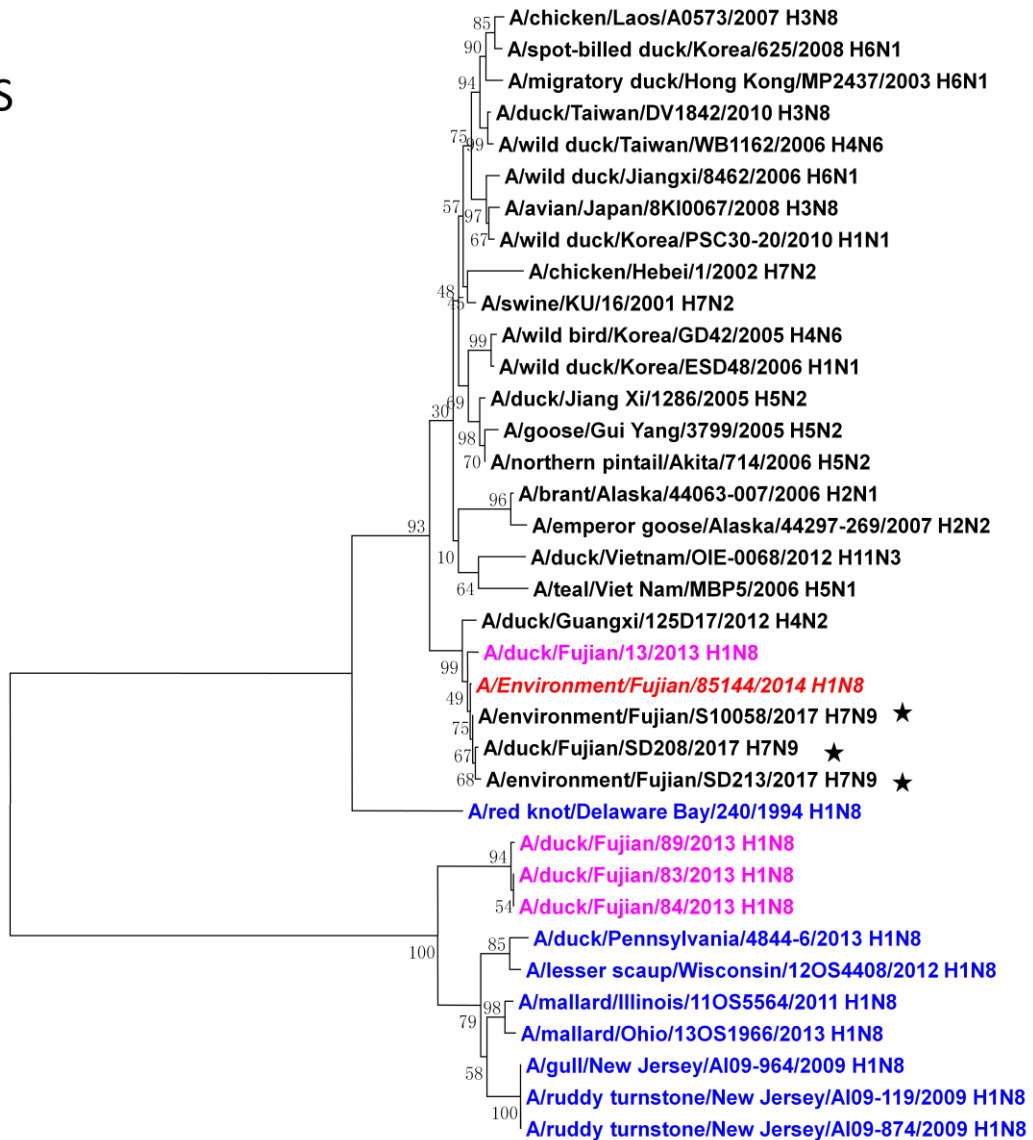

0.05
